# Supplementary material for: A post-wildfire response in cave dripwater chemistry
Source: Copernicus journal article supplement (doi:10.5194/hess-20-2745-2016), 2016-07-21
Supplement: Supplementary file 1 [file hess-20-2745-2016-supplement.zip]

# **A post-wildfire response in cave dripwater chemistry**

**Gurinder Nagra<sup>1\*</sup>, Pauline C. Treble<sup>1,2</sup>, Martin S. Andersen<sup>1</sup>, Ian J. Fairchild<sup>3</sup>,  
Katie Coleborn<sup>1</sup>, Andy Baker<sup>1</sup>**

[1] {Connected Waters Initiative Research Centre, University of New South Wales, Sydney,  
NSW, 2052, Australia}

[2] {Institute for Environmental Research, Australian Nuclear Science and Technological  
Organisation, Lucas Heights, NSW, 2234, Australia}

[3] {School of Geography, Earth and Environmental Sciences, University of Birmingham,  
Edgbaston, Birmingham, UK}

Correspondence to: G. Nagra (g.nagra@unsw.edu.au)

## **SUPPLEMENTARY MATERIAL**

19    Supplementary Figure 1) The entrance to Yonderup cave, showing distinct fracturing which  
20    has occurred post-fire and indicative of a high intensity fire (photograph taken March 2015).

21

22

23

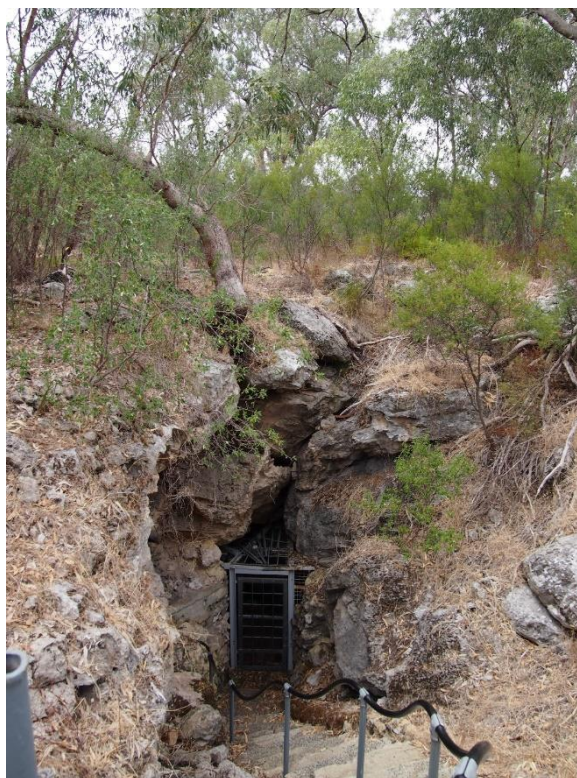

24 Supplementary Figure 2) Images of Site 1a a) soil cover above the site, showing exposed  
25 bedrock b) ‘wheat field’ of stalactites on the roof c) dead tuart tree above site 1a with  
26 exposed bedrock cover. The photograph was taken March 2015. Due to the close proximity  
27 of the tree above the site, infiltration water chemistry may have been affected by the wood  
28 ash created as this tree was burnt during the fire.

29

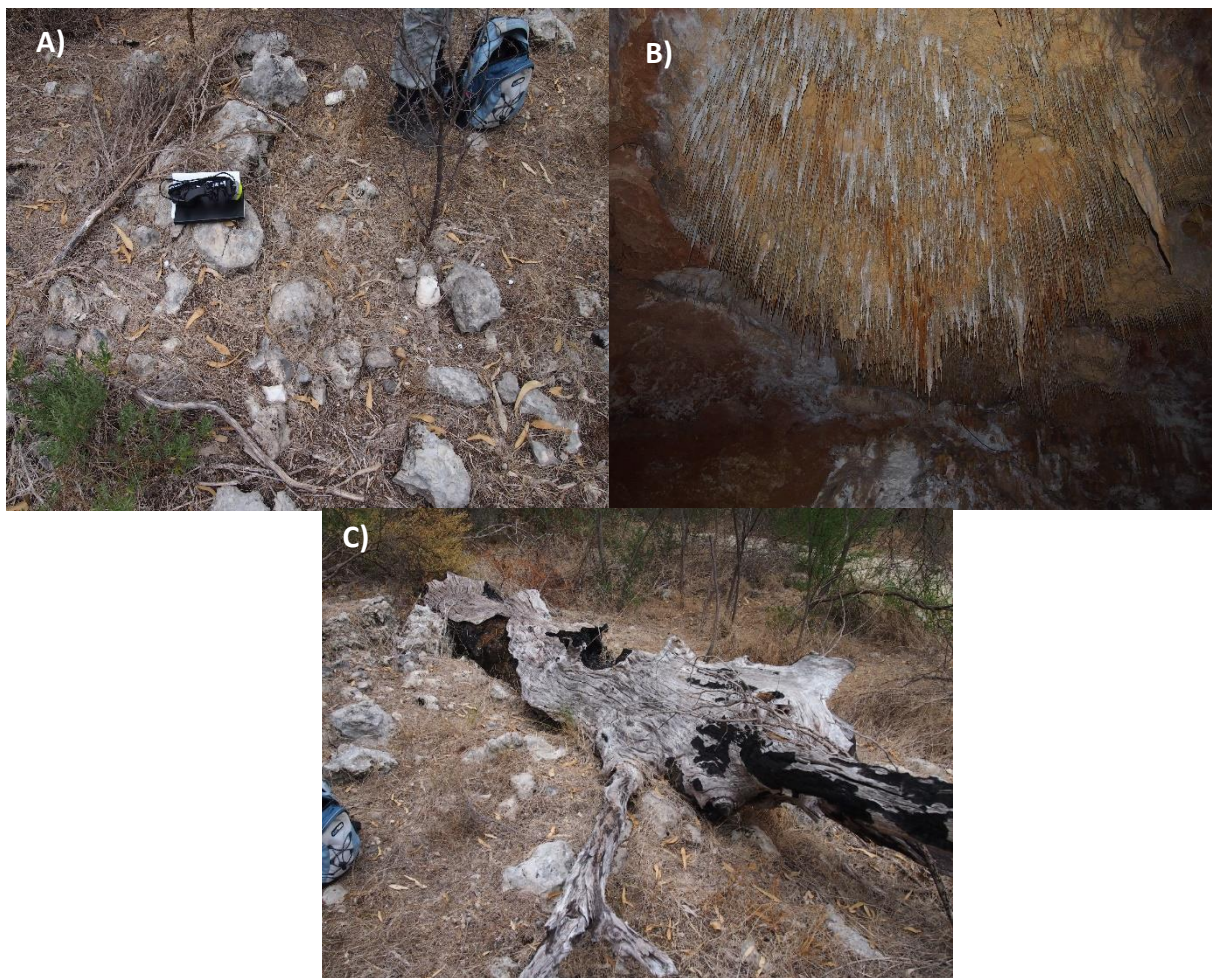

30

31

32

33     Supplementary Figure 3) Site 2a and its ‘Cathedral’ like structure with large stalactites  
34     hanging from the roof.

35

36

37

38

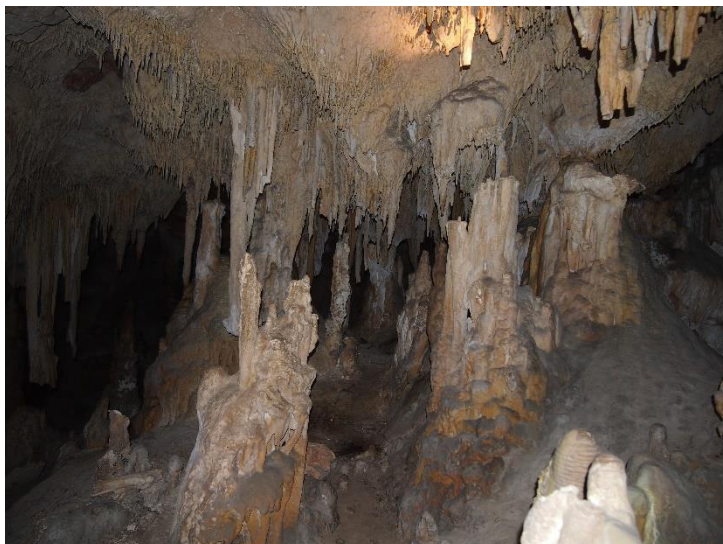



Supplementary Figure 4) Photos of regrowth 7 months after wildfire at Yanchep.

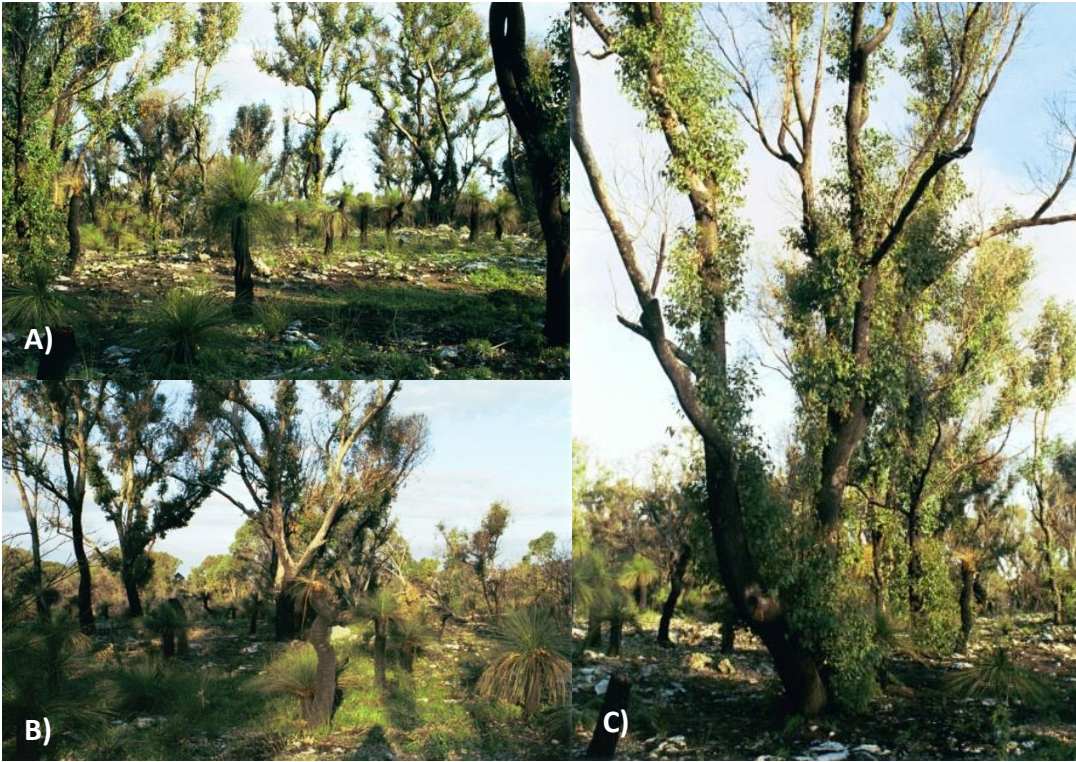

Supplementary Figure 5) Regrowth post-wildfire in Yanchep National Park from (A) August 2005 to (B) March 2015.

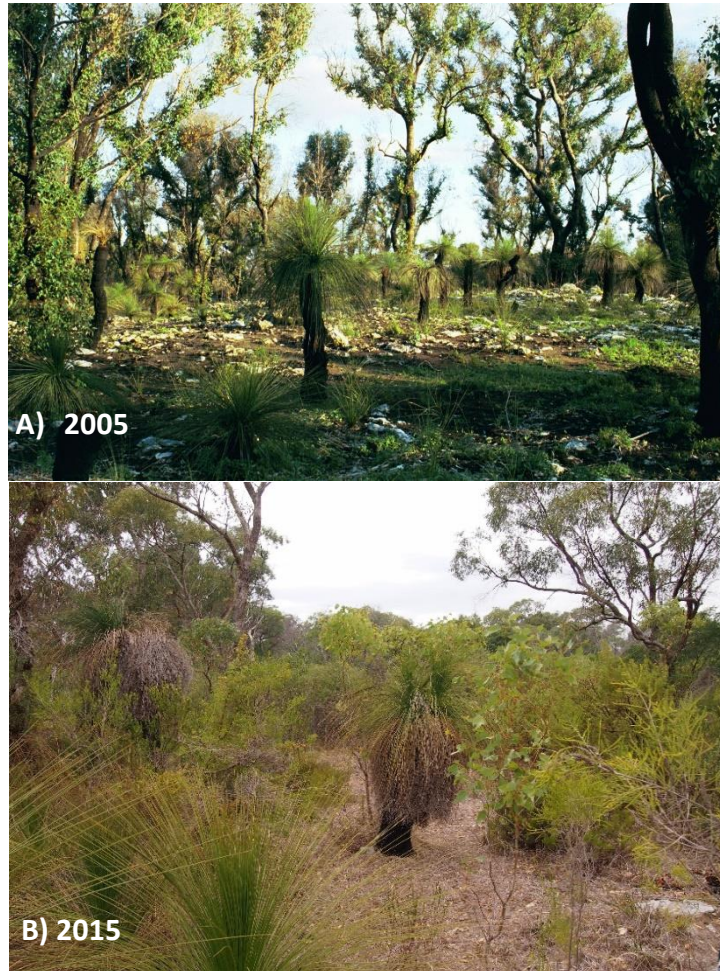

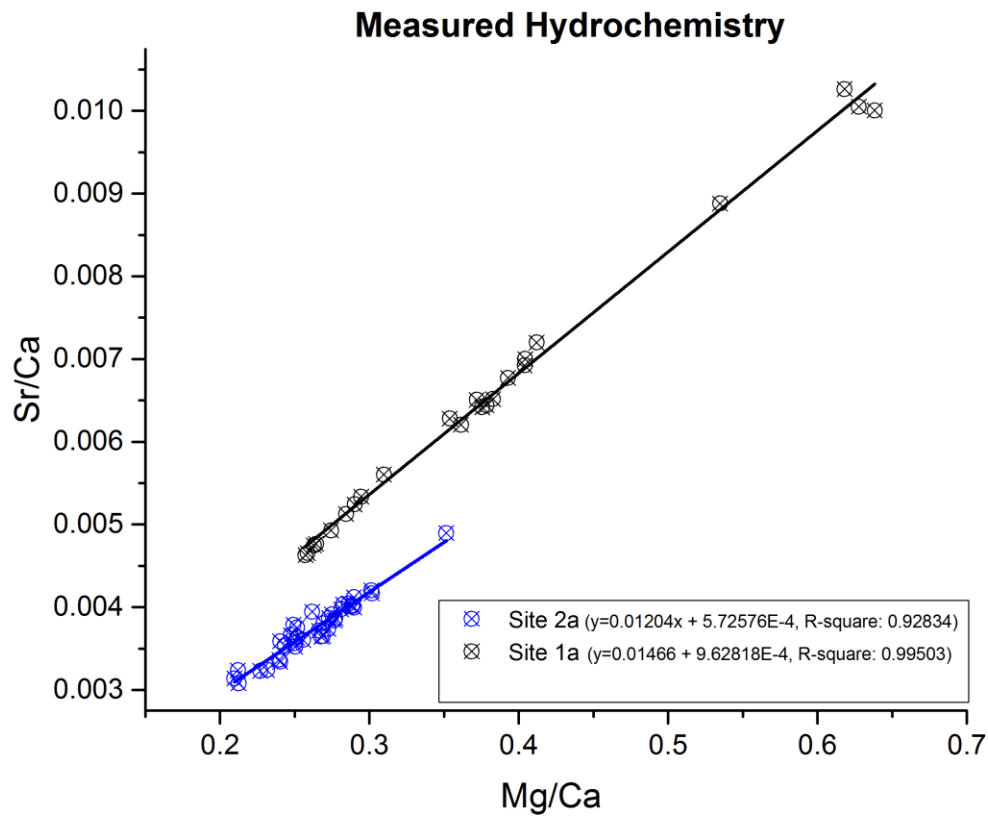

84

85 Figure 2. Relationship between Sr/Ca vs Mg/Sr for both Site 1a (black) and Site 2a (blue),  
 86 this indicates that both sites have independent flow paths. Further both sites fall within the  
 87 diagnostic model for water-rock interactions that include PCP by Sinclair (2011) and Treble  
 88 et al. (2015) who found PCP to be a dominating in-cave process in Golgotha Cave 300 km,  
 89 south of Yonderup Cave. We discuss this in further depth later in our paper.

90

91

92     **Refer to excel file for following captions: DR\_Geo\_Tables**

93     Table DR1) Shows anion and cations data in mg/L and mmol/L for Site 1a (DR1A) and Site  
94     2a (DR1B).

95     Table DR2) Show isotopic data using IRMS method (A) and CRDS method (B) at both Site  
96     1a and Site 2a.

97     Discharge Calculations of Site 1a and Site 2a.

98     Table DR3) Show soil depth from centre point above each site, every meter for five meters in  
99     directions North, South, East and West.

100    Water balance calculations: These include P - AET calculations and cumulative water  
101    balance (CWB).
