# Supplementary material for: A post-wildfire response in cave dripwater chemistry
Source: Copernicus journal article supplement (doi:10.5194/hess-20-2745-2016), 2016-07-21
Supplement: Supplementary file 2 [file hess-20-2745-2016-supplement.zip]

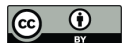

## *Supplement of*

# **A post-wildfire response in cave dripwater chemistry**

**G. Nagra et al.**

*Correspondence to:* Gurinder Nagra ([g.nagra@unsw.edu.au](mailto:g.nagra@unsw.edu.au))

- [hess-20-2745-2016-supplement-title-page.pdf](#)
- [DR\\_Geol\\_Tables.xlsx](#)
- [Supp-Material\\_HESS\\_2015.pdf](#)

The copyright of individual parts of the supplement might differ from the CC-BY 3.0 licence.
